# Supplementary material for: Pharmacy Services beyond the Basics: A Qualitative Study to Explore Perspectives of Pharmacists towards Basic and Enhanced Pharmacy Services in Pakistan
Source: MDPI journal article supplement (doi:10.3390/ijerph17072379), 2020-03-31
Supplement: s1 [file s1]

## Supplementary File 1

### *“Interview schema for pharmacists”*

**Q1. Are you familiar with the term pharmacy services?**

- ✓ If yes, please explain
- ✓ Who provides pharmacy services?

**Q2. What type of pharmacy services are being offered in Pakistan?**

- ✓ Selection, posology, counseling, dispensing, use, administration, prescription monitoring, storage, sale, procurement, distribution pharmacovigilance, pharmacoepidemiology, Pharmacoeconomics, poison control, drug utilization review, drug utilization evaluation

**Q3. At which level these services can be or are being provided?**

- ✓ Healthcare institutions (pharmacy, medical store, hospital medical institution)
- ✓ Are healthcare institutions providing pharmacy services?

**Q4. Do you think that these pharmacy services are according to existing pharmacy rules?**

- ✓ If yes, please explain
- ✓ If no, then why?

**Q5. In your opinion, is there a need of pharmacy services in Pakistan?**

- ✓ If yes, then give reason
- ✓ Patient safety
- ✓ Economic
- ✓ Improve disease management
- ✓ Improve quality of life and health outcomes

**Q6. In your opinion, why pharmacy services are not offered in Pakistan?**

**Q7. How we can implement pharmacy services in Pakistan?**

- ✓ Is there anything that should be changed and at what level to make this easier?
